# Supplementary material for: The first total synthesis of the marine acetylenic alcohol, lembehyne B – a selective inducer of early apoptosis in leukemia cancer cells
Source: Royal Society of Chemistry journal article supplement (doi:10.1039/c6ob02346k), 2016-12-08

## Supporting Information

### **The first total synthesis of the marine acetylenic alcohol, lembehynes B - a selective inducer of early apoptosis in leukemia cancer cells**

*Lilya U. Dzhemileva,<sup>a,b\*</sup> Vladimir A. D'yakonov,<sup>a\*</sup> Alexey A. Makarov,<sup>a</sup> Evgeny N. Andreev,<sup>a</sup>  
Milyausha M. Yunusbaeva,<sup>a</sup> and Usein M. Dzhemilev,<sup>a</sup>*

*a* Laboratory of Catalytic Synthesis, Institute of Petrochemistry and Catalysis of RAS (IPC RAS),  
Prospect Octyabrya, 141, 450075, Ufa (Russian Federation), E-mail: DyakonovVA@gmail.com

*b* Department of Immunology and Human Reproductive Health Bashkir State Medical University,  
Lenin Street, 3, 450003, Ufa (Russian Federation), E-mail: Dzhemilev@mail.ru

*E-mail: Dzhemilev@mail.ru, DyakonovVA@gmail.com*

## Supporting Information – NMR Spectra

### Content

|                                                                                              |    |
|----------------------------------------------------------------------------------------------|----|
| 2-[(13Z,17Z)-Tetraconta-13,17-dien-1-yloxy]tetrahydro-2H-pyran (4) <sup>1</sup> H-NMR.....   | S3 |
| 2-[(13Z,17Z)-Tetraconta-13,17-dien-1-yloxy]tetrahydro-2H-pyran (4) <sup>13</sup> C-NMR. .... | S3 |
| (13Z,17Z)-Tetraconta-13,17-dien-1-ol (5) <sup>1</sup> H-NMR. ....                            | S4 |
| (13Z,17Z)-Tetraconta-13,17-dien-1-ol (5) <sup>13</sup> C-NMR. ....                           | S4 |
| (13Z,17Z)-Tetraconta-13,17-dien-1-al (6) <sup>1</sup> H-NMR.....                             | S5 |
| (13Z,17Z)-Tetraconta-13,17-dien-1-al (6) <sup>13</sup> C-NMR.....                            | S5 |
| (15Z,19Z)-1-(Trimethylsilyl)hexatriaconta-15,19-dien-1-yn-3-ol (7) <sup>1</sup> H-NMR.....   | S6 |
| (15Z,19Z)-1-(Trimethylsilyl)hexatriaconta-15,19-dien-1-yn-3-ol (7) <sup>13</sup> C-NMR.....  | S6 |
| rac-Lembeyne B (8) <sup>1</sup> H-NMR.....                                                   | S7 |
| rac-Lembeyne B (8) <sup>13</sup> C-NMR.....                                                  | S7 |
| (15Z,19Z)-Hexaconta-15,19-dien-1-yl-3-one (9) <sup>1</sup> H-NMR.....                        | S8 |
| (15Z,19Z)-Hexaconta-15,19-dien-1-yl-3-one (9) <sup>13</sup> C-NMR.....                       | S8 |
| Lembeyne B (10) <sup>1</sup> H-NMR.....                                                      | S9 |
| Lembeyne B (10) <sup>13</sup> C-NMR.....                                                     | S9 |

## 2-[(13Z,17Z)-Tetraconta-13,17-dien-1-yloxy]tetrahydro-2H-pyran (4) <sup>1</sup>H-NMR.

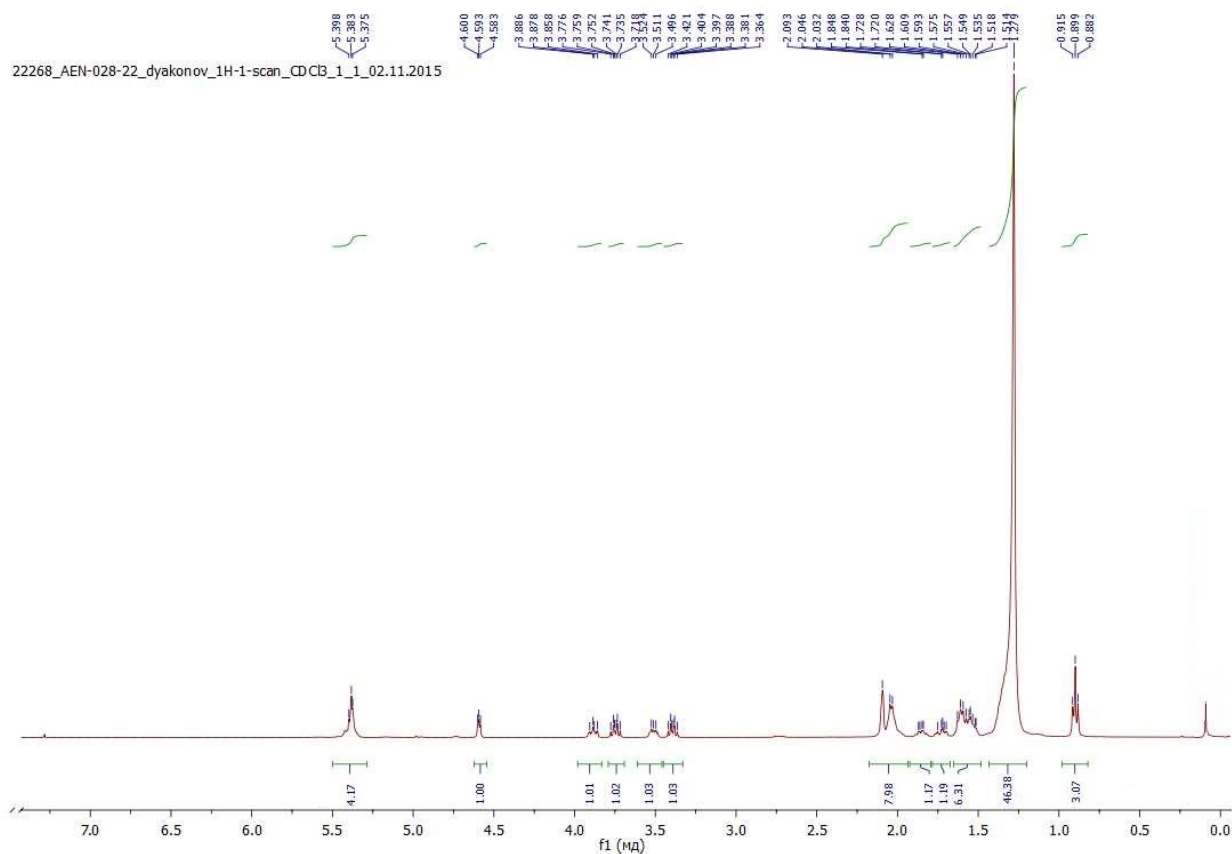

## 2-[(13Z,17Z)-Tetraconta-13,17-dien-1-yloxy]tetrahydro-2H-pyran (4) <sup>13</sup>C-NMR.

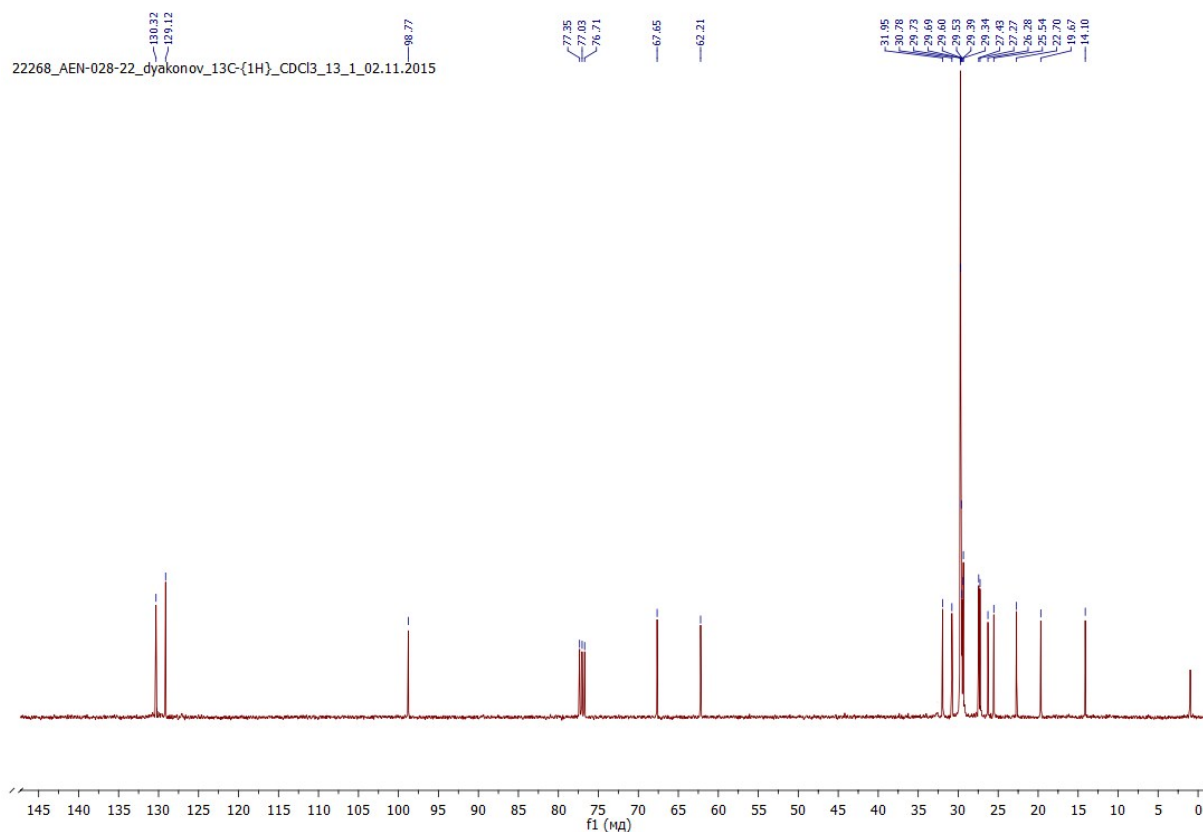

**(13Z,17Z)-Tetraconta-13,17-dien-1-ol (5) <sup>1</sup>H-NMR.**

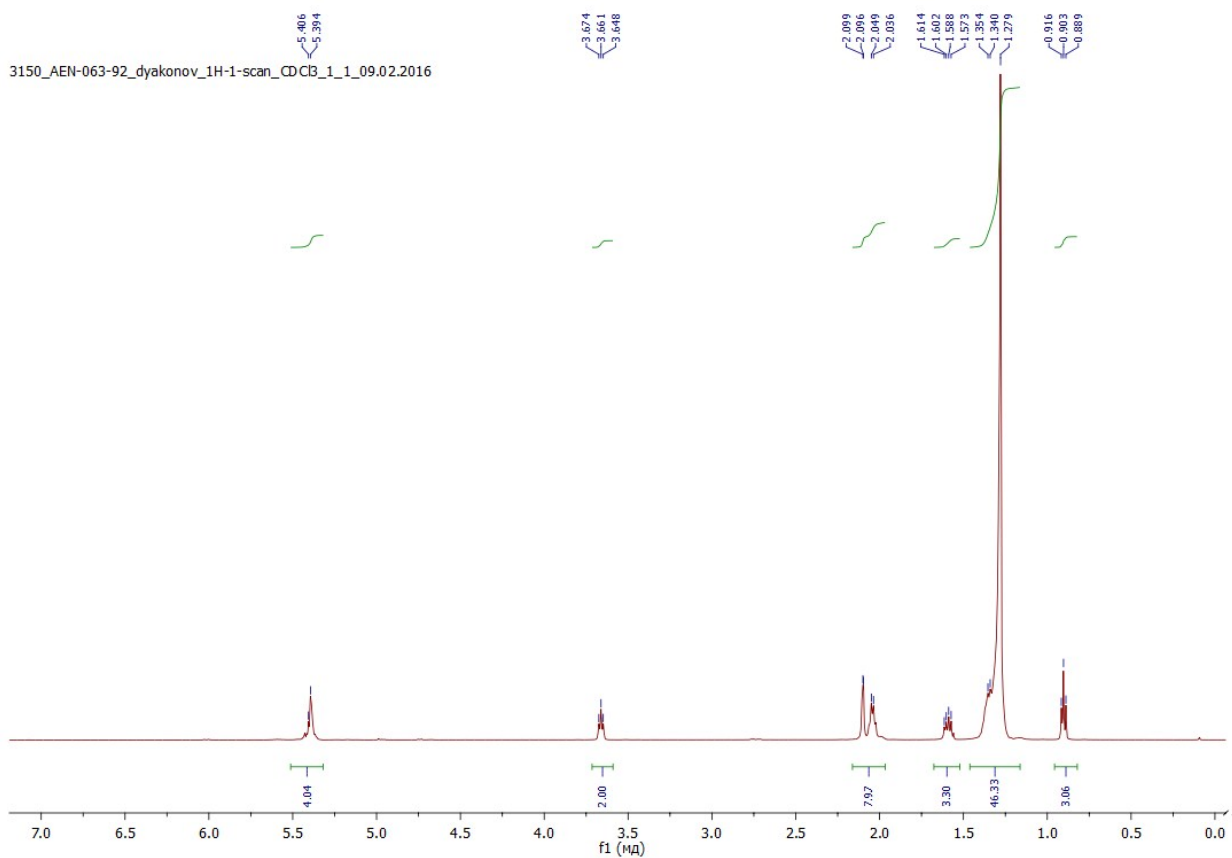

**(13Z,17Z)-Tetraconta-13,17-dien-1-ol (5) <sup>13</sup>C-NMR.**

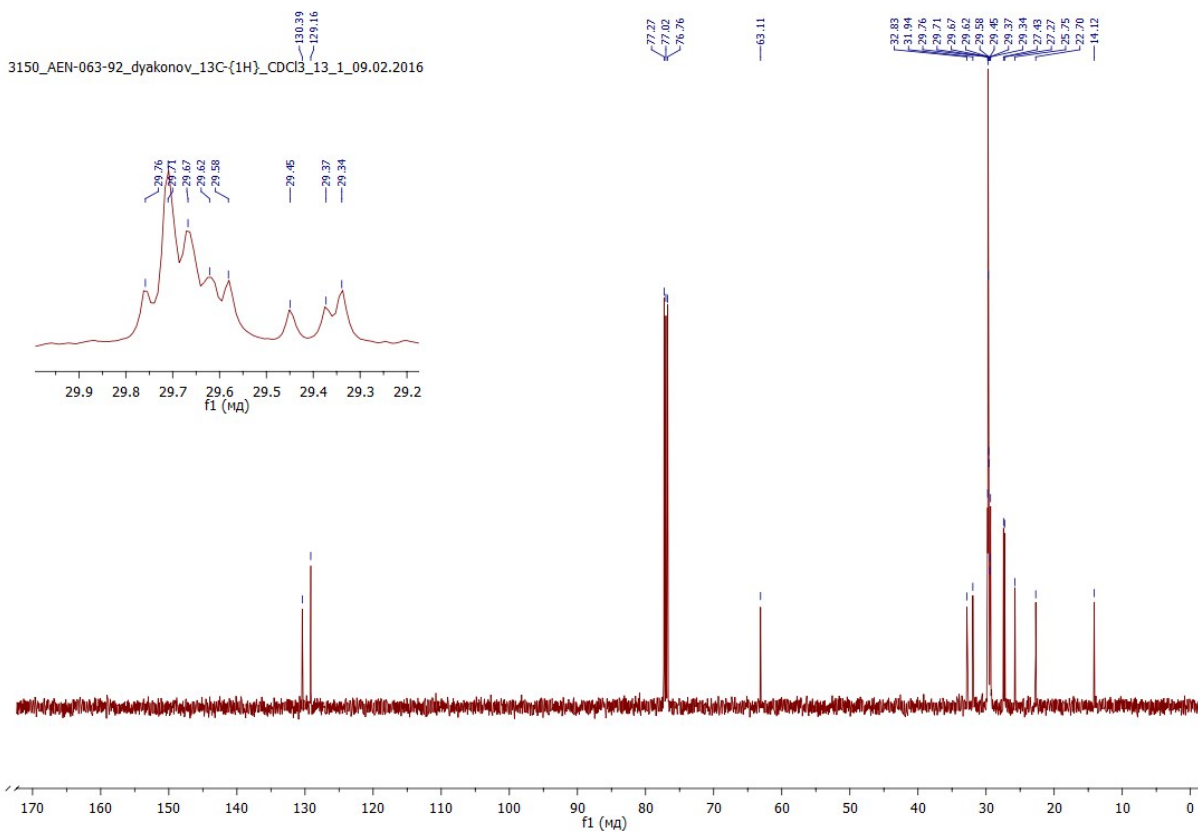

**(13Z,17Z)-Tetraconta-13,17-dien-1-al (6) <sup>1</sup>H-NMR**

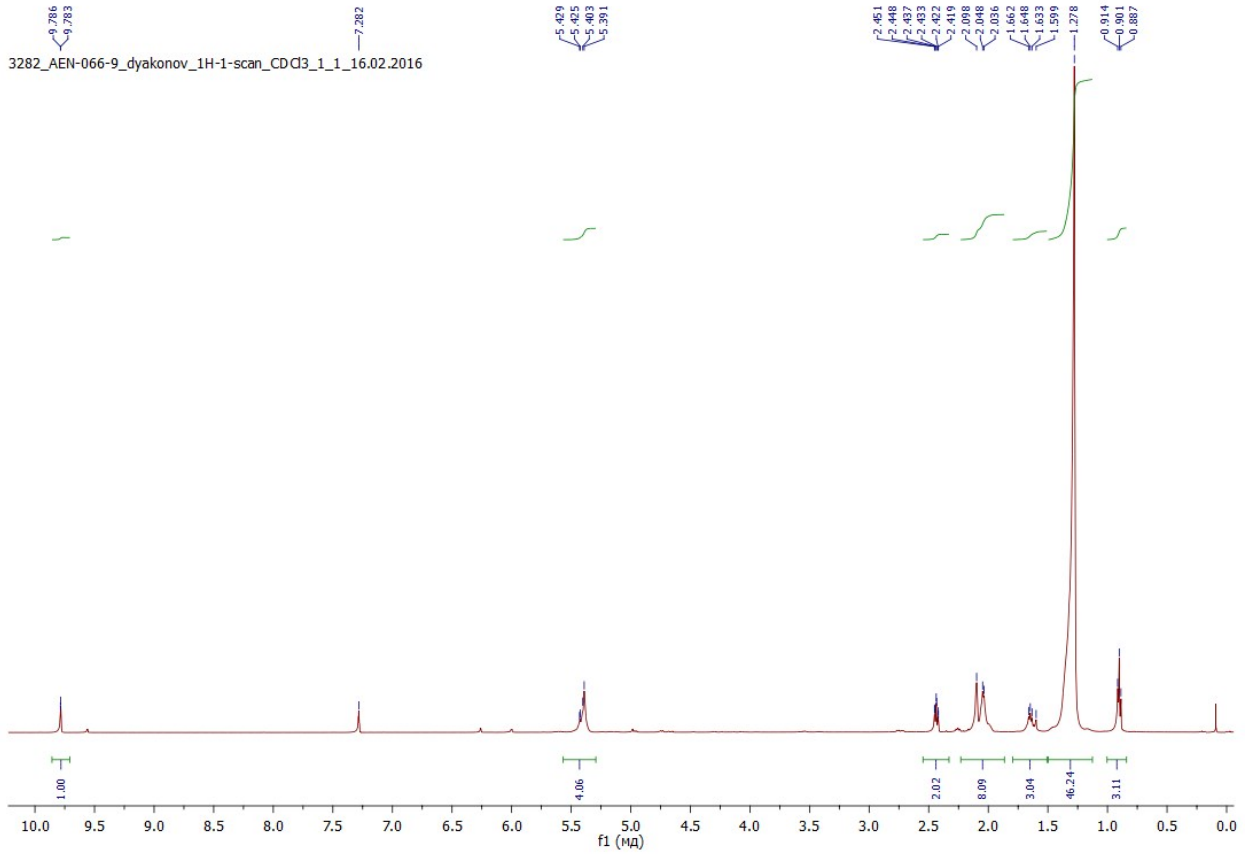

**(13Z,17Z)-Tetraconta-13,17-dien-1-al (6) <sup>13</sup>C-NMR**

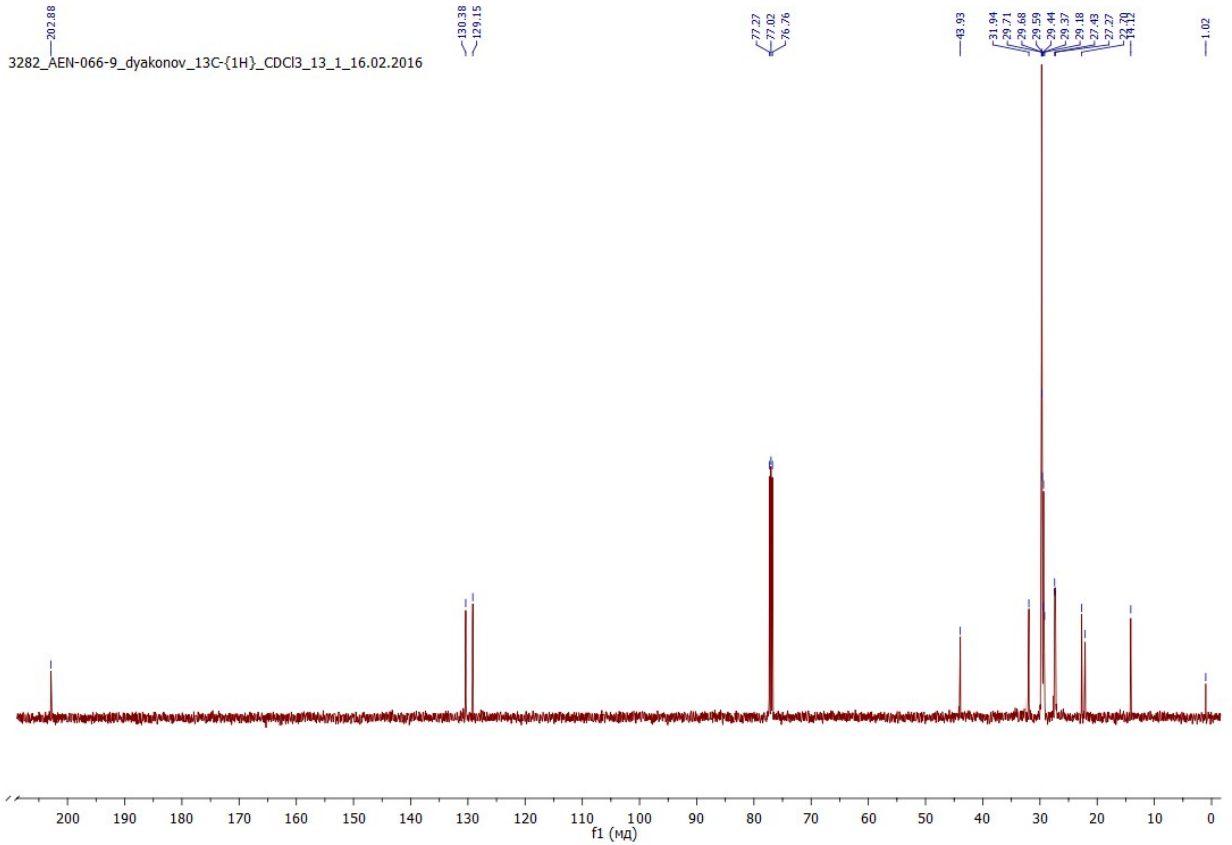

**(15Z,19Z)-1-(Trimethylsilyl)hexatriaconta-15,19-dien-1-yn-3-ol (7) <sup>1</sup>H-NMR**

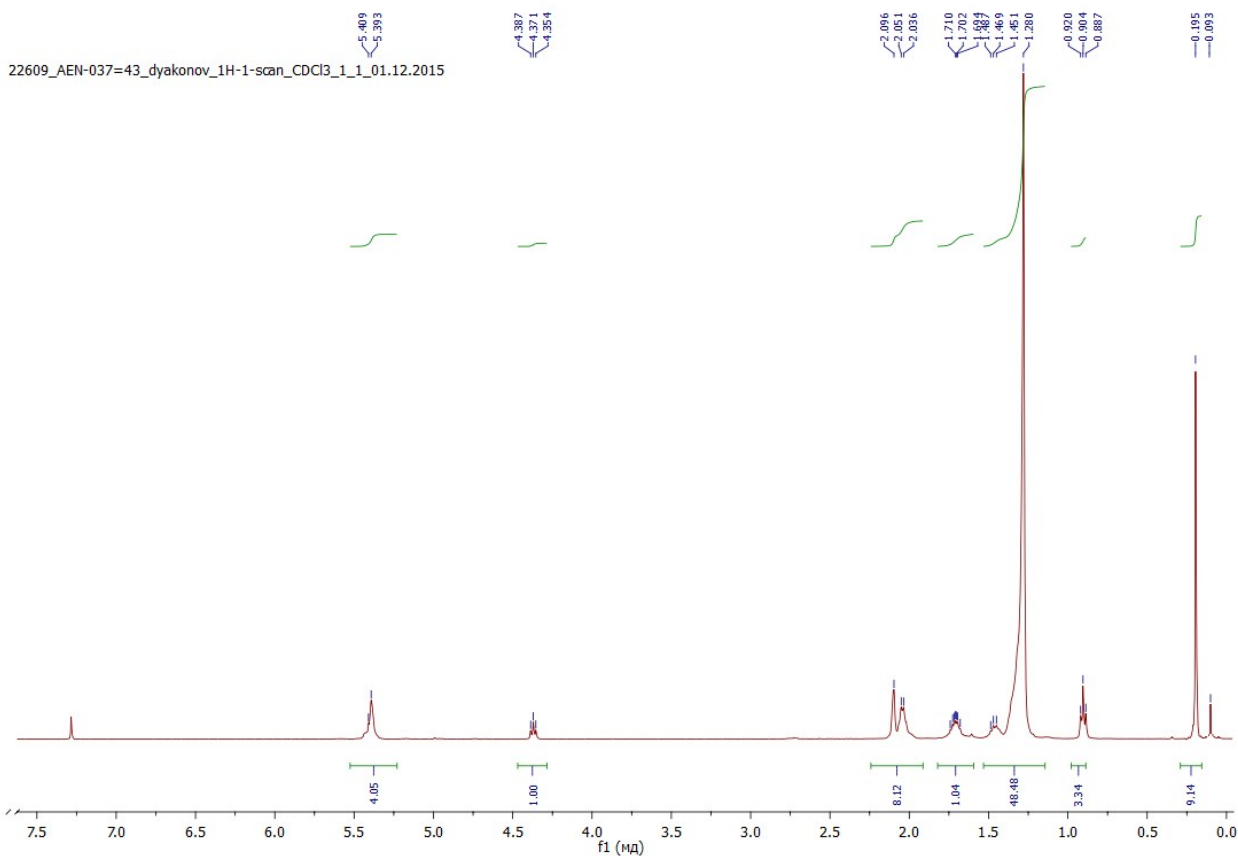

**(15Z,19Z)-1-(Trimethylsilyl)hexatriaconta-15,19-dien-1-yn-3-ol (7) <sup>13</sup>C-NMR**

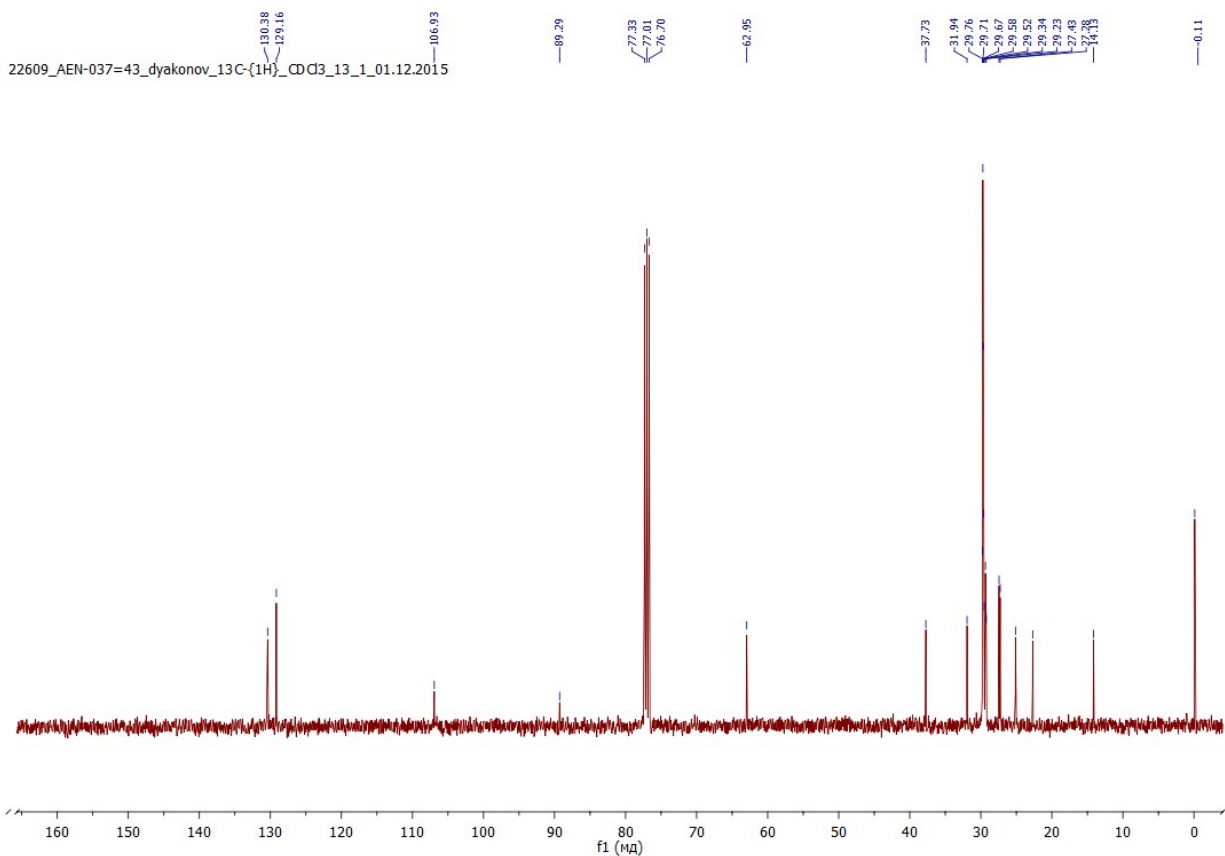

### rac-Lembehyne B (8) <sup>1</sup>H-NMR

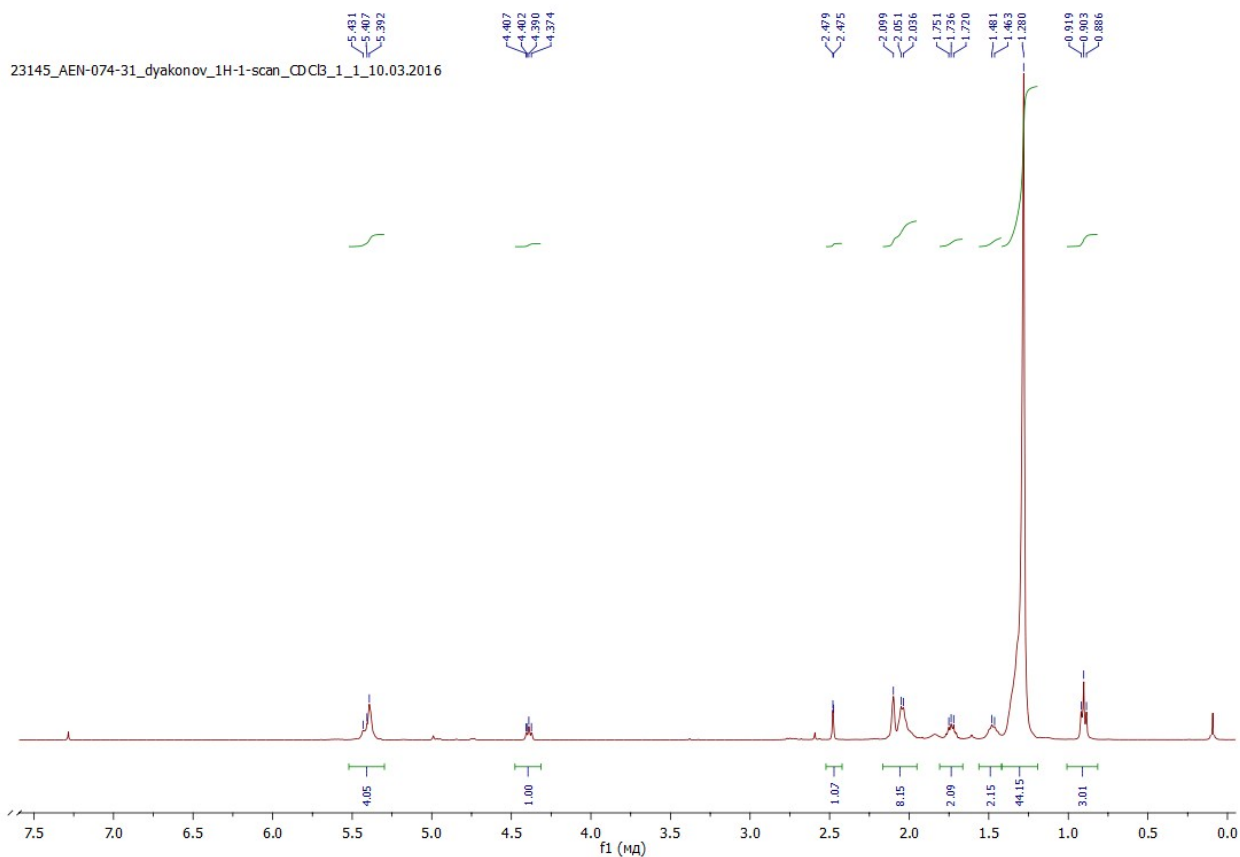

### rac-Lembehyne B (8) <sup>13</sup>C-NMR

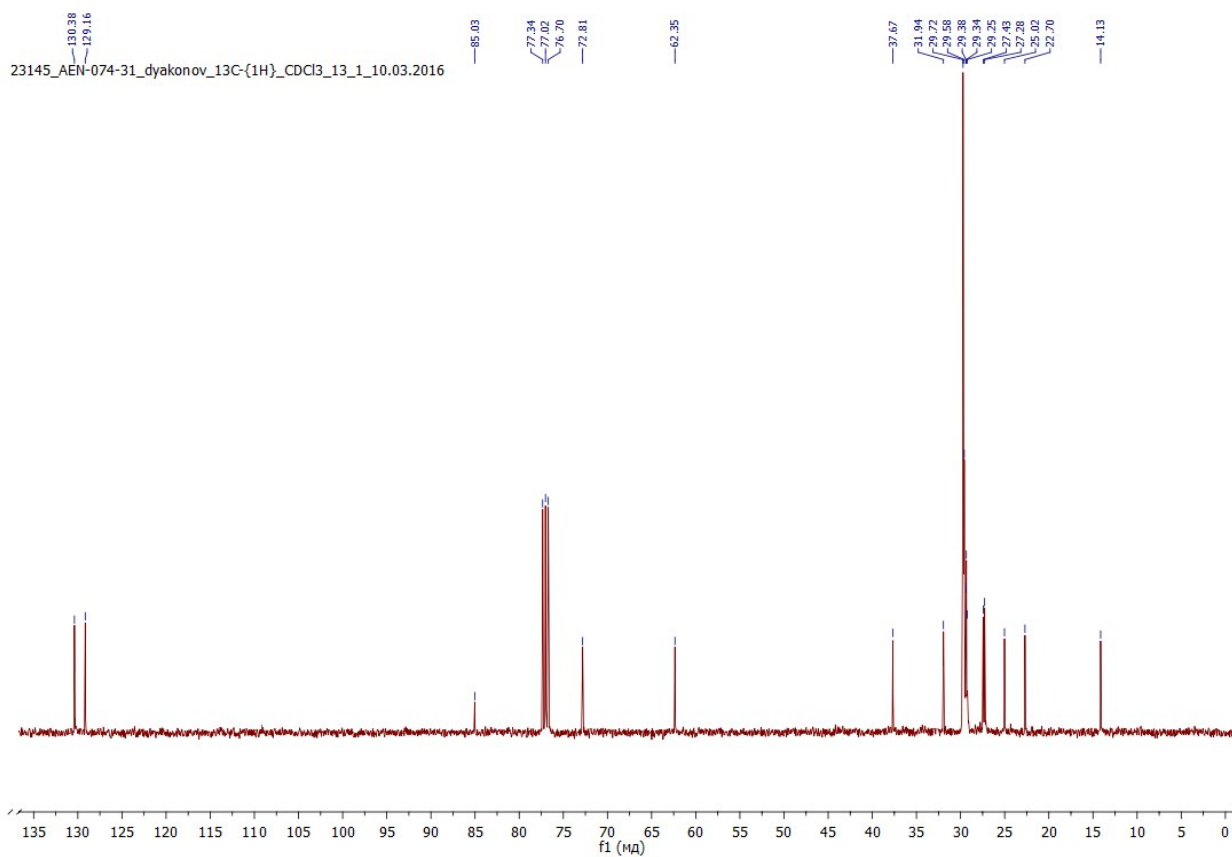

### (15Z,19Z)-Hexaconta-15,19-dien-1-yl-3-one (9) <sup>1</sup>H-NMR

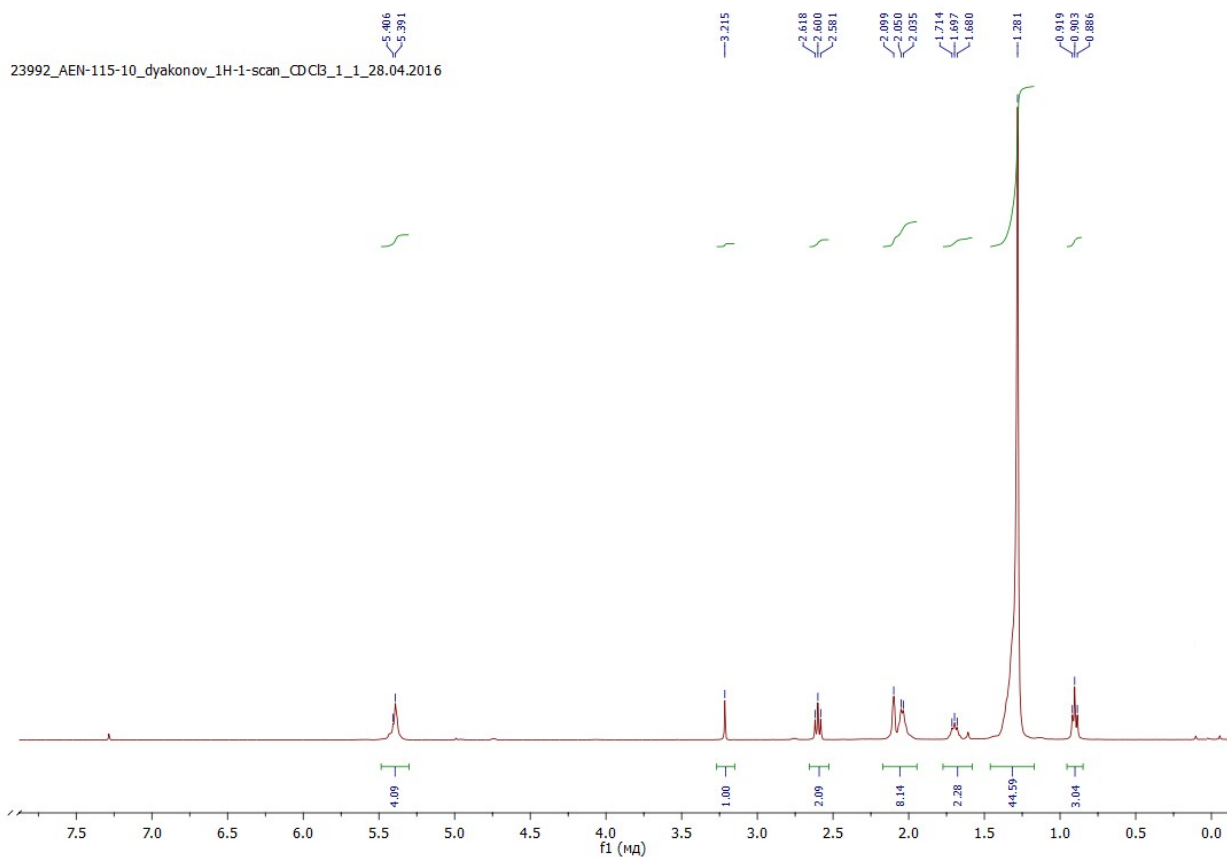

### (15Z,19Z)-Hexaconta-15,19-dien-1-yl-3-one (9) <sup>13</sup>C-NMR

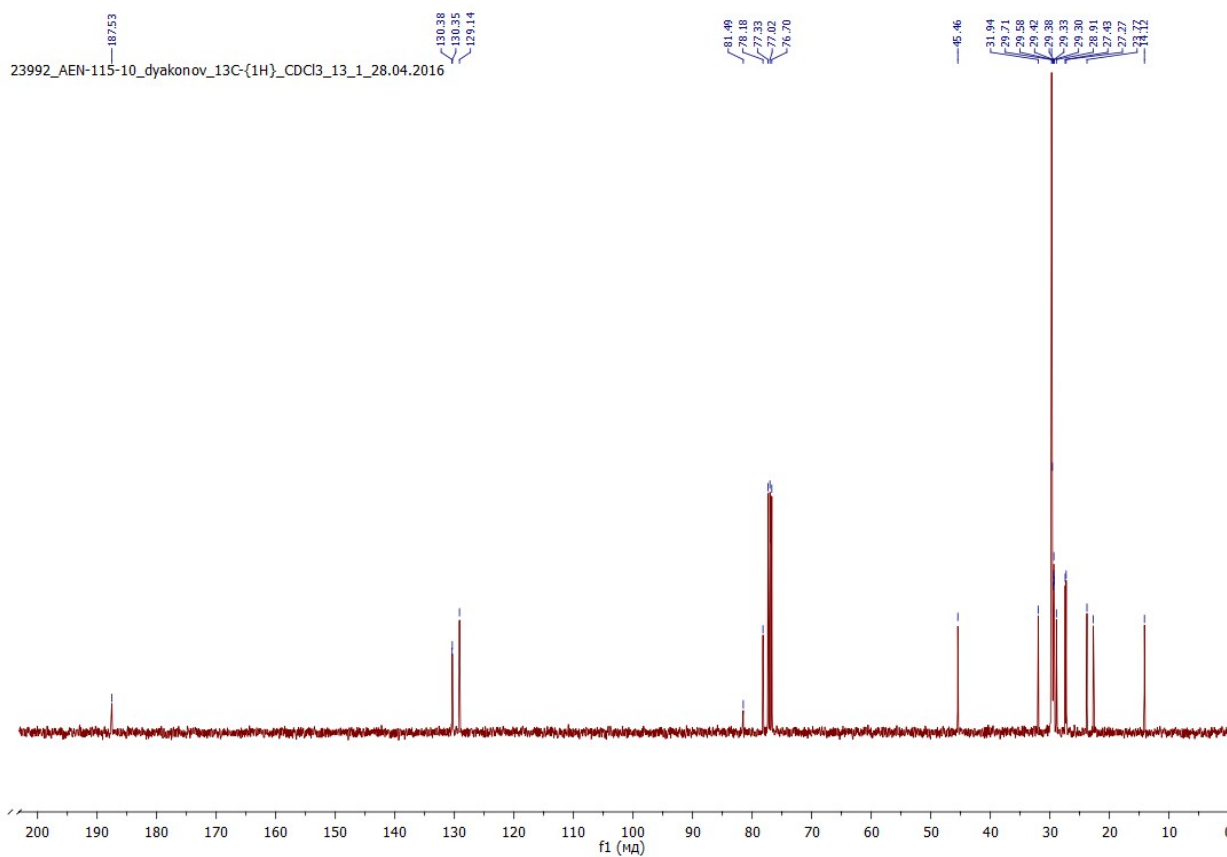



## Lembehyne B (10) <sup>1</sup>H-NMR

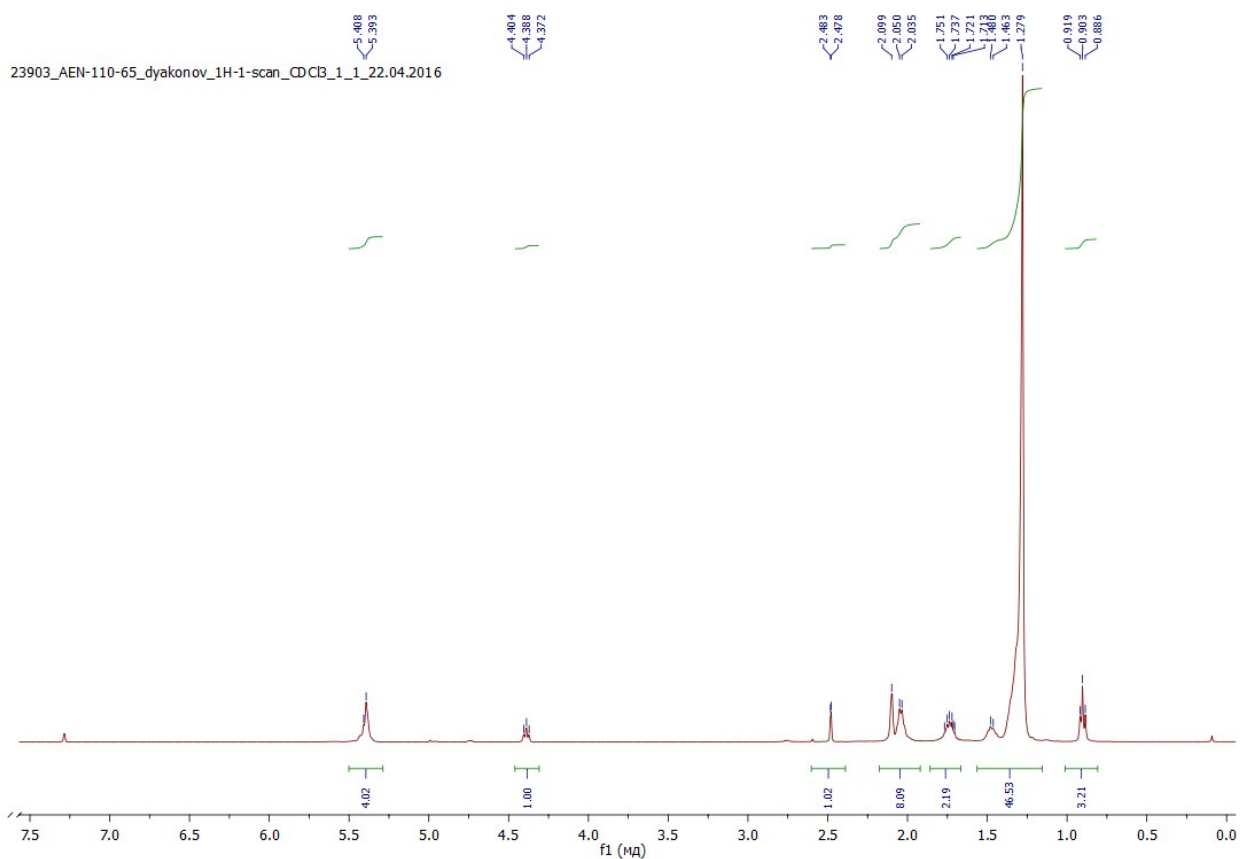

## Lembehyne B (10) <sup>13</sup>C-NMR

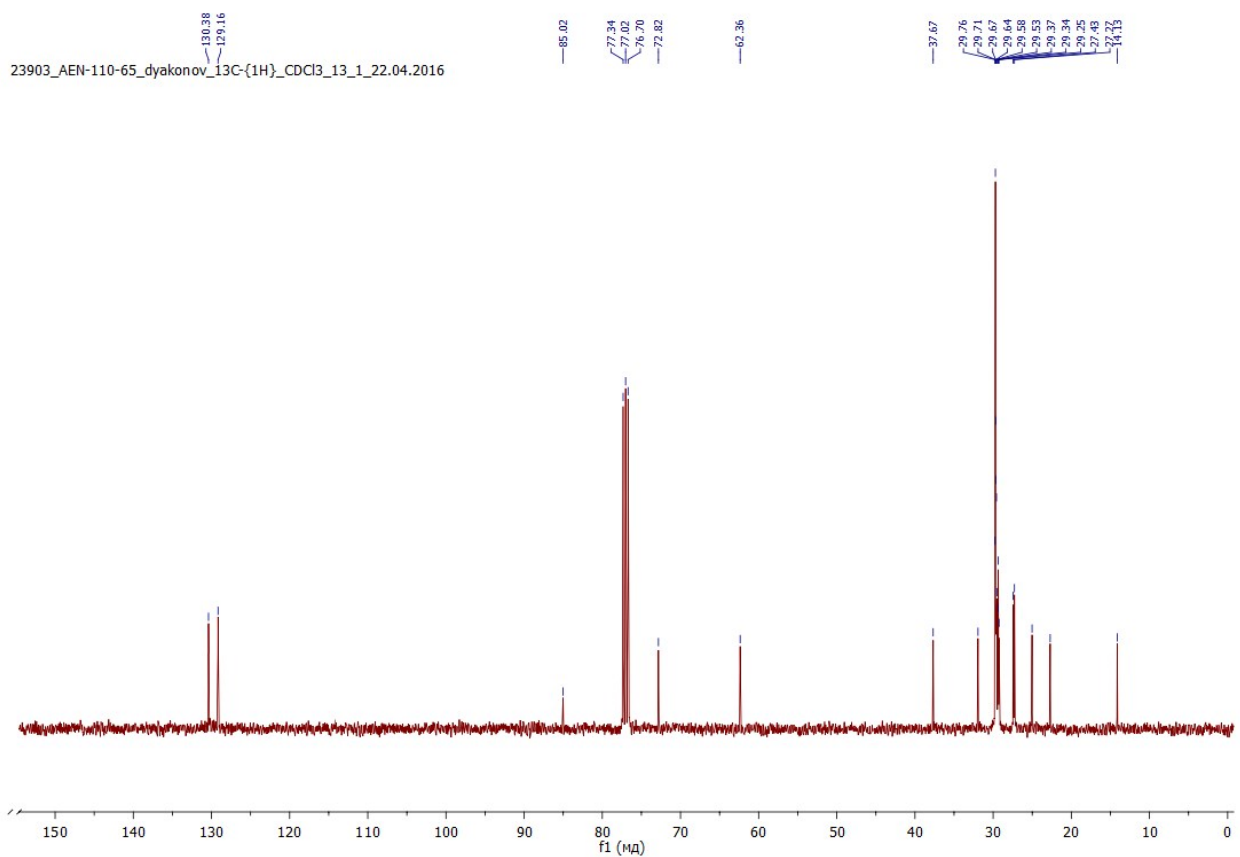

Supplement: c6ob02346k1.pdf [file c6ob02346k1.pdf]
